# Supplementary material
Source: PubMed Central journal article supplement (PMC4252829)
Supplement: NIHMS627820-supplement-3.pdf [file NIHMS627820-supplement-3.pdf]

Table S1. Centrality metrics for CS+UCS, CS-UCS, and UCS alone

| <b>Node</b>      | <b>In-Degree</b> | <b>Out-Degree</b> | <b>Total Degree</b> | <b>Closeness</b> | <b>Betweenness</b> |
|------------------|------------------|-------------------|---------------------|------------------|--------------------|
| <b>CS+UCS</b>    |                  |                   |                     |                  |                    |
| dmPFC            | 5                | 0                 | 5                   | 0                | 0                  |
| vmPFC            | 3                | 5                 | 8                   | 1.643            | 0                  |
| R dIPFC(1)       | 4                | 7                 | 11                  | 1.571            | 3.133              |
| R dIPFC(2)       | 5                | 0                 | 5                   | 0                | 0                  |
| LdIPFC(1)        | 8                | 2                 | 10                  | 2.143            | 12.75              |
| L dIPFC(2)       | 3                | 14                | 17                  | 1                | 5.63               |
| L dIPFC(3)       | 6                | 10                | 16                  | 1.286            | 26.533             |
| R IPL(1)         | 0                | 0                 | 0                   | 0                | 0                  |
| R IPL(2)         | 5                | 3                 | 8                   | 2.714            | 2.33               |
| L IPL            | 5                | 12                | 17                  | 1.143            | 7.433              |
| R Insula         | 4                | 11                | 15                  | 1.214            | 4.05               |
| L Insula         | 6                | 8                 | 14                  | 1.429            | 10.133             |
| R Amyg           | 4                | 0                 | 4                   | 0                | 0                  |
| L Amyg           | 5                | 0                 | 5                   | 0                | 0                  |
| PCC              | 5                | 0                 | 5                   | 0                | 0                  |
| <b>CS-UCS</b>    |                  |                   |                     |                  |                    |
| dmPFC            | 6                | 3                 | 9                   | 1.786            | 1.183              |
| vmPFC            | 4                | 6                 | 10                  | 1.571            | 0.533              |
| R dIPFC(1)       | 6                | 0                 | 6                   | 0                | 0                  |
| R dIPFC(2)       | 5                | 7                 | 12                  | 1.5              | 1.933              |
| L dIPFC(1)       | 5                | 0                 | 5                   | 0                | 0                  |
| L dIPFC(2)       | 3                | 14                | 17                  | 1                | 2.15               |
| L dIPFC(3)       | 5                | 6                 | 11                  | 1.571            | 2.167              |
| R IPL (1)        | 5                | 0                 | 5                   | 0                | 0                  |
| R IPL(2)         | 5                | 0                 | 5                   | 0                | 0                  |
| L IPL            | 5                | 14                | 19                  | 1                | 7.517              |
| R Insula         | 4                | 9                 | 13                  | 1.357            | 1.917              |
| L Insula         | 6                | 0                 | 6                   | 0                | 0                  |
| R Amyg           | 4                | 0                 | 4                   | 0                | 0                  |
| L Amyg           | 6                | 14                | 20                  | 1                | 21.6               |
| PCC              | 4                | 0                 | 4                   | 0                | 0                  |
| <b>UCS alone</b> |                  |                   |                     |                  |                    |
| dmPFC            | 3                | 10                | 13                  | 1.286            | 49.283             |
| vmPFC            | 5                | 1                 | 6                   | 2.857            | 31                 |
| R dIPFC(1)       | 3                | 3                 | 6                   | 3.857            | 1.167              |
| R dIPFC(2)       | 3                | 0                 | 3                   | 0                | 0                  |
| L dIPFC(1)       | 5                | 3                 | 8                   | 2.643            | 3.283              |
| L dIPFC(2)       | 3                | 1                 | 4                   | 3.571            | 20.2               |
| L dIPFC(3)       | 3                | 10                | 13                  | 1.286            | 6.25               |
| R IPL(1)         | 4                | 0                 | 4                   | 0                | 0                  |
| R IPL(2)         | 5                | 3                 | 8                   | 2                | 53.083             |

|          |   |    |    |       |       |
|----------|---|----|----|-------|-------|
| L IPL    | 2 | 14 | 16 | 1     | 7.2   |
| R Insula | 3 | 8  | 11 | 1.429 | 2.783 |
| L Insula | 5 | 0  | 5  | 0     | 0     |
| R Amyg   | 3 | 0  | 3  | 0     | 0     |
| L Amyg   | 5 | 3  | 8  | 3.714 | 16.75 |
| PCC      | 4 | 0  | 4  | 0     | 0     |

Abbreviations: L, left; R, right; dlPFC, dorsolateral prefrontal cortex; dmPFC, dorsomedial prefrontal cortex; vmPFC, ventromedial prefrontal cortex; Amyg, amygdala; IPL, inferior parietal lobule; PCC, posterior cingulate cortex.
