# Supplementary material
Source: PubMed Central journal article supplement (PMC4252829)
Supplement: NIHMS627820-supplement-4.pdf [file NIHMS627820-supplement-4.pdf]

Table S2. Paths with greater connectivity during CS+UCS trials than during UCS alone trials

| Source Node | Target Node | t-value  | p-value  |
|-------------|-------------|----------|----------|
| L dIPFC(3)  | R dIPFC(2)  | -2.57782 | 0.00499  |
| L dIPFC(3)  | L Insula    | -2.75294 | 0.002967 |
| L dIPFC(3)  | L dIPFC(2)  | -2.84564 | 0.002228 |
| L dIPFC(3)  | R IPL(1)    | -3.1345  | 0.000867 |
| L dIPFC(3)  | L Amyg      | -2.50819 | 0.006088 |
| L Insula    | R dIPFC(2)  | -3.76816 | 8.35E-05 |
| L Insula    | L dIPFC(3)  | -2.66243 | 0.003895 |
| L Insula    | L IPL       | -3.19713 | 0.0007   |
| L Insula    | R IPL(2)    | -2.46567 | 0.00686  |
| L Insula    | R Insula    | -3.25512 | 0.000572 |
| L Insula    | L dIPFC(1)  | -3.77514 | 8.12E-05 |
| L Insula    | L dIPFC(2)  | -2.82733 | 0.002359 |
| R dIPFC(1)  | L Insula    | -3.69263 | 0.000113 |
| R dIPFC(1)  | R IPL(2)    | -3.48744 | 0.000247 |
| R dIPFC(1)  | L dIPFC(1)  | -2.68526 | 0.00364  |
| R dIPFC(1)  | R dIPFC(2)  | -3.14444 | 0.000838 |
| R dIPFC(1)  | L Amyg      | -3.25863 | 0.000565 |
| R dIPFC(1)  | R Amyg      | -2.5058  | 0.00613  |
| R Insula    | dmPFC       | 3.014173 | 0.001297 |
| R Insula    | R dIPFC(2)  | 2.626358 | 0.004333 |
| R Insula    | L dIPFC(3)  | 2.42506  | 0.007676 |
| R Insula    | L Insula    | 3.685862 | 0.000116 |
| R Insula    | L IPL       | 3.202623 | 0.000687 |
| R Insula    | R IPL(2)    | 2.768114 | 0.002833 |
| R Insula    | R IPL(1)    | 3.28971  | 0.000506 |
| R Insula    | vmPFC       | 3.45522  | 0.000278 |
| R Insula    | L Amyg      | 4.001545 | 3.21E-05 |
| L dIPFC(1)  | L dIPFC(3)  | 3.422423 | 0.000314 |
| L dIPFC(1)  | PCC         | 3.175072 | 0.000755 |
| L dIPFC(2)  | dmPFC       | 3.400879 | 0.000339 |
| L dIPFC(2)  | R dIPFC(2)  | 4.659288 | 1.64E-06 |
| L dIPFC(2)  | L dIPFC(3)  | 3.348996 | 0.000409 |
| L dIPFC(2)  | PCC         | 4.070508 | 2.39E-05 |
| L dIPFC(2)  | L Insula    | 5.438159 | 2.86E-08 |
| L dIPFC(2)  | L IPL       | 4.119934 | 1.94E-05 |
| L dIPFC(2)  | R dIPFC(1)  | 4.49676  | 3.55E-06 |
| L dIPFC(2)  | R IPL(2)    | 3.99711  | 3.27E-05 |
| L dIPFC(2)  | R Insula    | 4.368743 | 6.42E-06 |
| L dIPFC(2)  | L dIPFC(1)  | 3.88223  | 5.26E-05 |
| L dIPFC(2)  | R IPL(1)    | 3.599348 | 0.000162 |
| L dIPFC(2)  | vmPFC       | 4.516085 | 3.25E-06 |

|            |          |          |          |
|------------|----------|----------|----------|
| L dIPFC(2) | L Amyg   | 4.092715 | 2.18E-05 |
| L dIPFC(2) | R Amyg   | 3.610989 | 0.000154 |
| vmPFC      | L Insula | 3.146199 | 0.000833 |

Abbreviations: L, left; R, right; dIPFC, dorsolateral prefrontal cortex; dmPFC, dorsomedial prefrontal cortex; vmPFC, ventromedial prefrontal cortex; Amyg, amygdala; IPL, inferior parietal lobule; PCC, posterior cingulate cortex.
