# Supplementary material
Source: PubMed Central journal article supplement (PMC4252829)
Supplement: NIHMS627820-supplement-5.pdf [file NIHMS627820-supplement-5.pdf]

Table S3. Paths with greater connectivity during UCS alone than during CS+UCS

| Source Node | Target Node | t-value  | p-value  |
|-------------|-------------|----------|----------|
| dmPFC       | R dIPFC(2)  | 3.554529 | 0.000192 |
| dmPFC       | L dIPFC(3)  | 3.980239 | 3.51E-05 |
| dmPFC       | L Insula    | 3.99193  | 3.34E-05 |
| dmPFC       | L IPL       | 3.97361  | 3.61E-05 |
| dmPFC       | R IPL(2)    | 4.761138 | 9.99E-07 |
| dmPFC       | R Insula    | 3.790828 | 7.62E-05 |
| dmPFC       | L dIPFC(1)  | 3.879393 | 5.33E-05 |
| dmPFC       | R IPL(1)    | 3.995724 | 3.29E-05 |
| dmPFC       | vmPFC       | 5.357629 | 4.47E-08 |
| dmPFC       | L Amyg      | 4.463383 | 4.15E-06 |
| L IPL       | R Insula    | 2.405194 | 0.008106 |
| L dIPFC(1)  | L Insula    | -3.11259 | 0.000934 |
| L dIPFC(1)  | R IPL(2)    | -3.39179 | 0.000351 |
| L dIPFC(1)  | vmPFC       | -3.27786 | 0.000528 |
| L Amyg      | dmPFC       | -2.87458 | 0.002034 |
| L Amyg      | L dIPFC(3)  | -2.83202 | 0.002325 |
| L Amyg      | PCC         | -2.68737 | 0.003617 |
| L Amyg      | L IPL       | -2.43744 | 0.007419 |
| L Amyg      | R IPL(2)    | -2.49595 | 0.006302 |

Abbreviations: L, left; R, right; dIPFC, dorsolateral prefrontal cortex; dmPFC, dorsomedial prefrontal cortex; vmPFC, ventromedial prefrontal cortex; Amyg, amygdala; IPL, inferior parietal lobule; PCC, posterior cingulate cortex. Numbers in parentheses indicate subregion ROI.
