# Supplementary material
Source: PubMed Central journal article supplement (PMC4252829)
Supplement: NIHMS627820-supplement-6.pdf [file NIHMS627820-supplement-6.pdf]

Table S4. Centrality metrics for stronger connections during CS+UCS than during UCS alone

| <b>Node</b> | <b>In-Degree</b> | <b>Out-Degree</b> | <b>Total Degree</b> | <b>Closeness</b> | <b>Betweenness</b> |
|-------------|------------------|-------------------|---------------------|------------------|--------------------|
| L dlPFC(3)  | 4                | 5                 | 9                   | 1.643            | 15.667             |
| R dlPFC(2)  | 5                | 0                 | 5                   | 0                | 0                  |
| L Insula    | 5                | 7                 | 12                  | 1.5              | 25.917             |
| L dlPFC(2)  | 2                | 14                | 16                  | 1                | 24.25              |
| R IPL(1)    | 3                | 0                 | 3                   | 0                | 0                  |
| L Amyg      | 4                | 0                 | 4                   | 2                | 0                  |
| L IPL       | 3                | 0                 | 3                   | 0                | 0                  |
| R IPL(2)    | 4                | 0                 | 4                   | 0                | 0                  |
| R Insula    | 2                | 9                 | 11                  | 1.571            | 4.083              |
| L dlPFC(1)  | 3                | 2                 | 5                   | 2.357            | 3.083              |
| R dlPFC(1)  | 1                | 6                 | 7                   | 1.786            | 0                  |
| R Amyg      | 2                | 0                 | 2                   | 0                | 0                  |
| dmPFC       | 2                | 0                 | 3                   | 0                | 0                  |
| vmPFC       | 2                | 1                 | 3                   | 2.357            | 0                  |
| PCC         | 2                | 0                 | 3                   | 0                | 0                  |

Abbreviations: L, left; R, right; dlPFC, dorsolateral prefrontal cortex; dmPFC, dorsomedial prefrontal cortex; vmPFC, ventromedial prefrontal cortex; Amyg, amygdala; IPL, inferior parietal lobule; PCC, posterior cingulate cortex. Numbers in parentheses indicate subregion ROI.
