# Supplementary material
Source: PubMed Central journal article supplement (PMC4252829)
Supplement: NIHMS627820-supplement-7.pdf [file NIHMS627820-supplement-7.pdf]

Table S5. Centrality metrics for stronger connections during UCS alone than during CS+UCS

| <b>Node</b> | <b>In-Degree</b> | <b>Out-Degree</b> | <b>Total Degree</b> | <b>Closeness</b> | <b>Betweenness</b> |
|-------------|------------------|-------------------|---------------------|------------------|--------------------|
| dmPFC       | 1                | 10                | 11                  | 1.091            | 5.5                |
| R dlPFC(2)  | 1                | 0                 | 1                   | 0                | 0                  |
| L dlPFC(3)  | 2                | 0                 | 2                   | 0                | 0                  |
| L Insula    | 2                | 0                 | 2                   | 0                | 0                  |
| L IPL       | 2                | 1                 | 3                   | 1                | 0.5                |
| R IPL(2)    | 3                | 0                 | 3                   | 0                | 0                  |
| R Insula    | 2                | 0                 | 2                   | 0                | 0                  |
| L dlPFC(1)  | 1                | 3                 | 4                   | 1                | 0                  |
| R IPL(1)    | 1                | 0                 | 1                   | 0                | 0                  |
| vmPFC       | 2                | 0                 | 2                   | 0                | 0                  |
| L Amyg      | 1                | 5                 | 6                   | 1.545            | 1                  |
| PCC         | 1                | 0                 | 1                   | 0                | 0                  |

Abbreviations: L, left; R, right; dlPFC, dorsolateral prefrontal cortex; dmPFC, dorsomedial prefrontal cortex; vmPFC, ventromedial prefrontal cortex; Amyg, amygdala; IPL, inferior parietal lobule; PCC, posterior cingulate cortex. Numbers in parentheses indicate subregion ROI.
